# Supplementary material for: Ecology and Host Identity Outweigh Evolutionary History in Shaping the Bat Microbiome
Source: PubMed Central journal article supplement (PMC7407897; doi:10.1128/msystems.00511-19), 2019-11-12

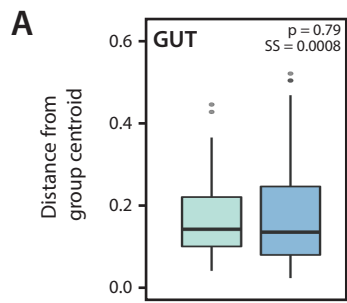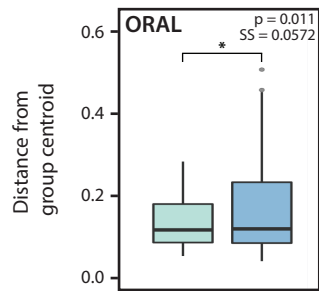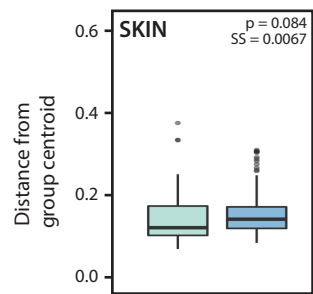

Frugivore  
Insectivore

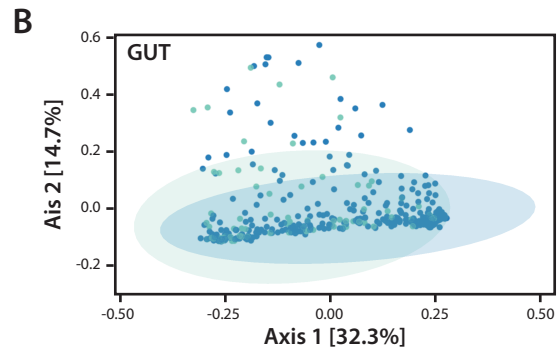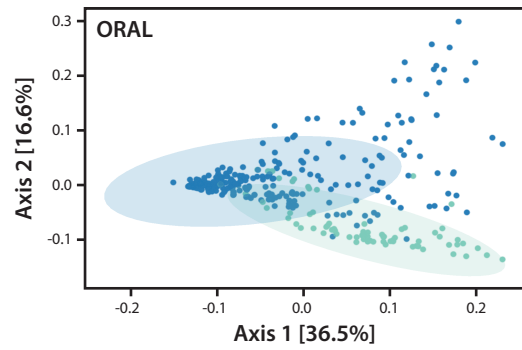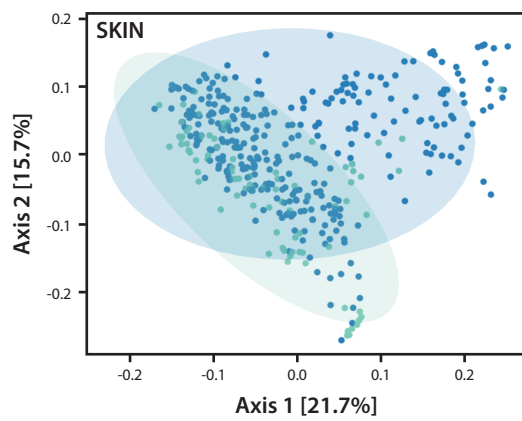

Supplement: mSystems.00511-19-sf005.pdf [file mSystems.00511-19-sf005.pdf]
